# Supplementary material
Source: PubMed Central journal article supplement (PMC4662916)
Supplement: NIHMS731207-supplement-2.pdf [file NIHMS731207-supplement-2.pdf]

## **Inventory of Supplemental Information**

### Supplemental Data

Figure S1 presents gene expression data, UCP1 protein levels and Ct values of endogenous controls, related to Figure 1.

Figure S2 shows food intake, physical activity, and basal and hepatic glucose production in ob/ob mice treated with GC-1 and supporting data in DIO treated with GC-1, related to Figure 2.

Figure S3 shows gene expression in BAT and scWAT and weight and fat loss of BAT-denervated ob/ob mice, and supporting data in BAT-denervated DIO mice, related to Figure 3.

Figure S4 presents data of ob/ob mice treated with TR agonist KB2115, related to Figure 4.

### Supplemental Experimental Procedures
